# Supplementary material
Source: ML conference proceedings conference paper supplement (https://openaccess.thecvf.com/content/CVPR2025/html/Wandel_SemAlign3D_Semantic_Correspondence_CVPR_2025_paper.html)
Supplement: Supplementary file 1 [file Wandel_SemAlign3D_Semantic_Correspondence_CVPR_2025_supplemental.pdf]

# SEMALIGN3D: Semantic Correspondence between RGB-Images through Aligning 3D Object-Class Representations

## Supplementary Material

### A. Additional Experimental Results

We qualitatively compare our method with DINO+SD [31] and GeoAware [32] on all SPair-71k [22] categories in Fig. 9 and Fig. 10. The results demonstrate that our method is applicable to a wide range of object-classes and can improve performance even if the 3D object-class representation is very coarse.

### B. Hyper-Parameters

We list the hyper-parameters in Tab. 5. The hyper-parameters  $\sigma_{\text{dense}}$ ,  $\sigma_{\text{sparse}}$ , and  $\sigma_{\text{sparse}}^{\text{inference}}$  correspond to the  $\sigma$  in Eq. (5) for  $C_{\text{dense}}$  and  $C_{\text{sparse}}$ , respectively. The hyper-parameter  $\sigma_{\text{sparse}}^{\text{inference}}$  is used for sparse semantic correspondence in Eq. (14). As discussed in the paper, it is crucial to start with a high  $\sigma$  and decrease its value over time to obtain a good alignment. Furthermore, we generally decrease  $\sigma_{\text{dense}}$  faster than  $\sigma_{\text{sparse}}$  to avoid local minima. Additionally, we choose  $\sigma_{\text{sparse}}^{\text{inference}}$  large for categories where our spatial prior is rather imprecise. However, as seen in Tab. 1, the imprecise spatial prior can still improve performance.

The weights  $w_{\text{dense}}$  and  $w_{\text{sparse}}$  are from Eq. (9) and  $w_{\text{geom}}$ ,  $w_{\text{background}}$ , and  $w_{\text{depth}}$  are from Eq. (13). We start with  $w_{\text{sparse}} = 0$  and increase its value over time to avoid local minima. Similarly, we also start with a small value for  $w_{\text{background}}$  as this term can lead to divergence if the representation does not sufficiently overlap with the object instance in the image, which is the case at the beginning of the optimization.

| Group     | Parameter                                   | Value                                                                                                                                     |
|-----------|---------------------------------------------|-------------------------------------------------------------------------------------------------------------------------------------------|
| Optimizer | Type                                        | AdamW                                                                                                                                     |
|           | lr                                          | 5e-3                                                                                                                                      |
|           | $n_{\text{steps}}$                          | 1000                                                                                                                                      |
| Sigmas    | $\sigma_{\text{dense}}$                     | Timesteps: [0, 300, 500]<br>Values: [1.0, 0.1, 0.03]                                                                                      |
|           | $\sigma_{\text{sparse}}$                    | Timesteps: [0, 300, 500, 700]<br>Values (Bottle): [1.0, 0.3, 0.3, 0.05]<br>Values (Other): [1.0, 0.1, 0.1, 0.05]                          |
|           | $\sigma_{\text{sparse}}^{\text{inference}}$ | Chair, TV: 0.01; Airplane, Bicycle, Bottle: 0.03; Other: 1.0                                                                              |
|           |                                             |                                                                                                                                           |
| Weights   | $w_{\text{dense}}$                          | 1.0                                                                                                                                       |
|           | $w_{\text{sparse}}$                         | Timesteps: [0, 500, 700, 1000]<br>Values (Bottle): [0, 0, 1, 10]<br>Values (Other): [0, 0, 10, 1]                                         |
|           | $w_{\text{geom}}$                           | 0.5                                                                                                                                       |
|           | $w_{\text{background}}$                     | Bottle:<br>Timesteps: [0, 700, 900, 1000]<br>Values: [0, 0, 1, 20]<br>Other:<br>Timesteps: [0, 300, 500, 700]<br>Values: [1, 10, 100, 10] |
|           |                                             |                                                                                                                                           |
|           |                                             |                                                                                                                                           |
|           | $w_{\text{depth}}$                          | 10.0                                                                                                                                      |
|           |                                             |                                                                                                                                           |

Table 5. Hyper-Parameters. *Values* are linearly interpolated according to *Timesteps*.

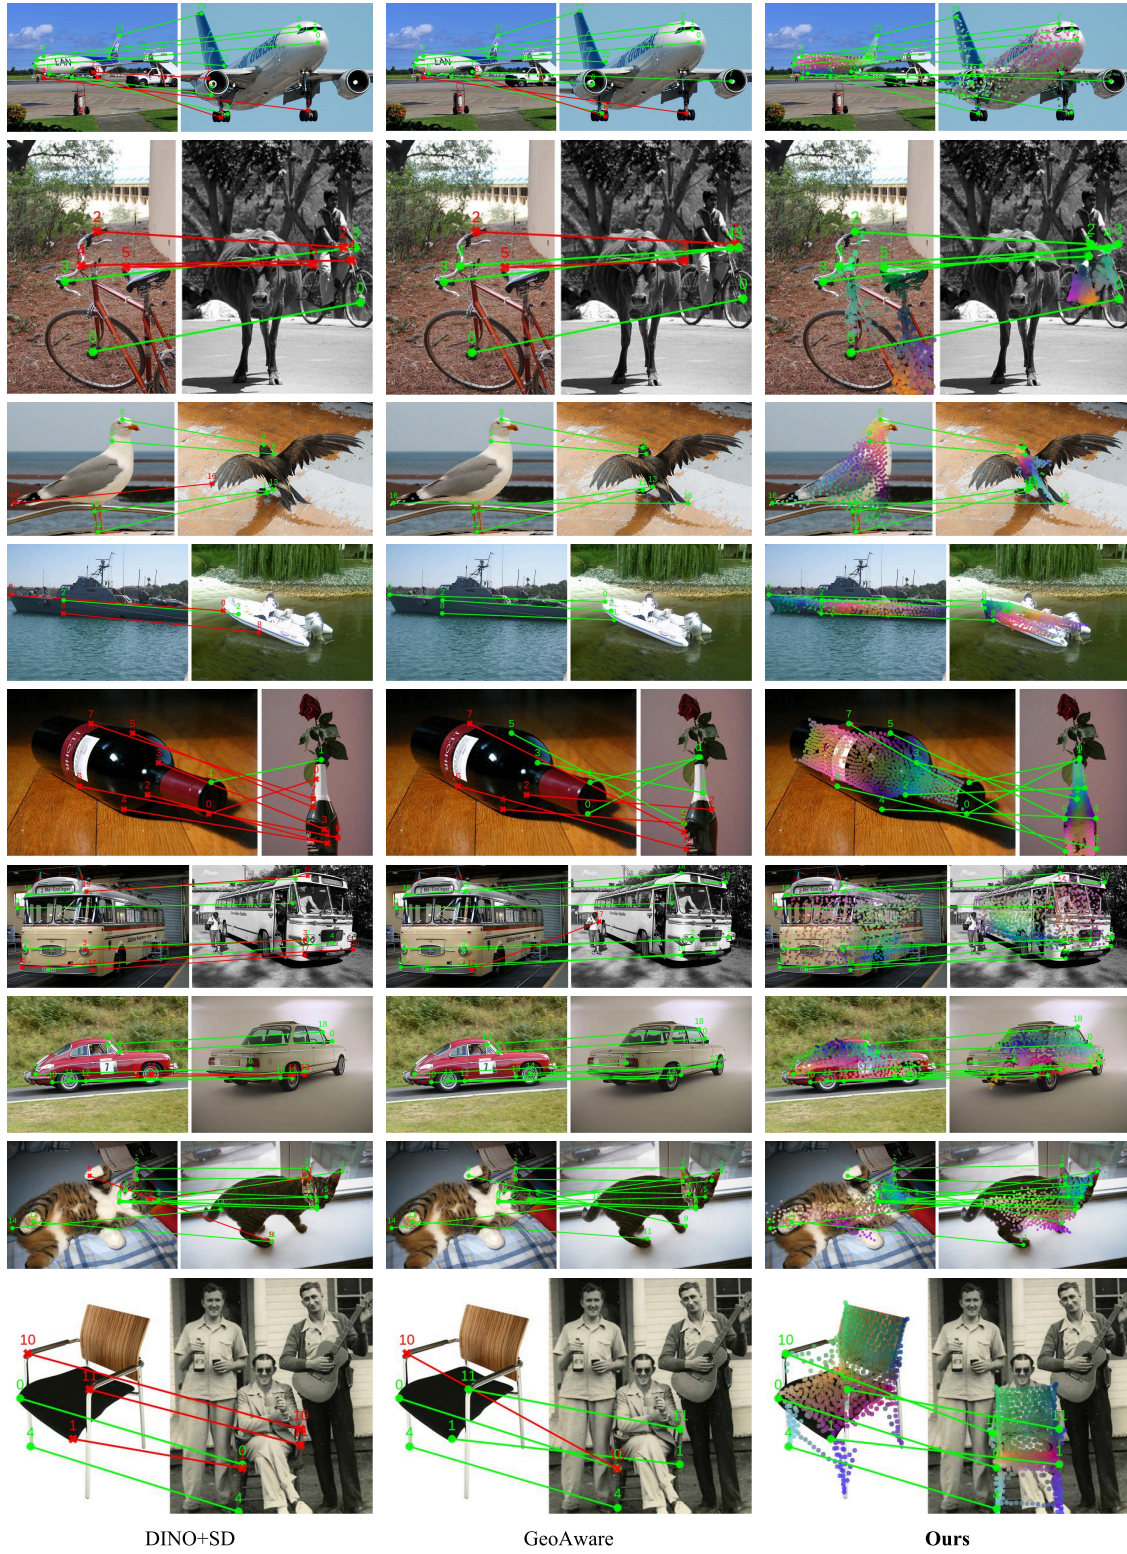

Figure 9. Qualitative comparison on SPair-71k [22] categories for sparse correspondence between DINO+SD [31], GeoAware (AP-10K P.T.) [32], and our method. Green lines (o-o) denote correct matches and red lines depict wrong matches (x-x).



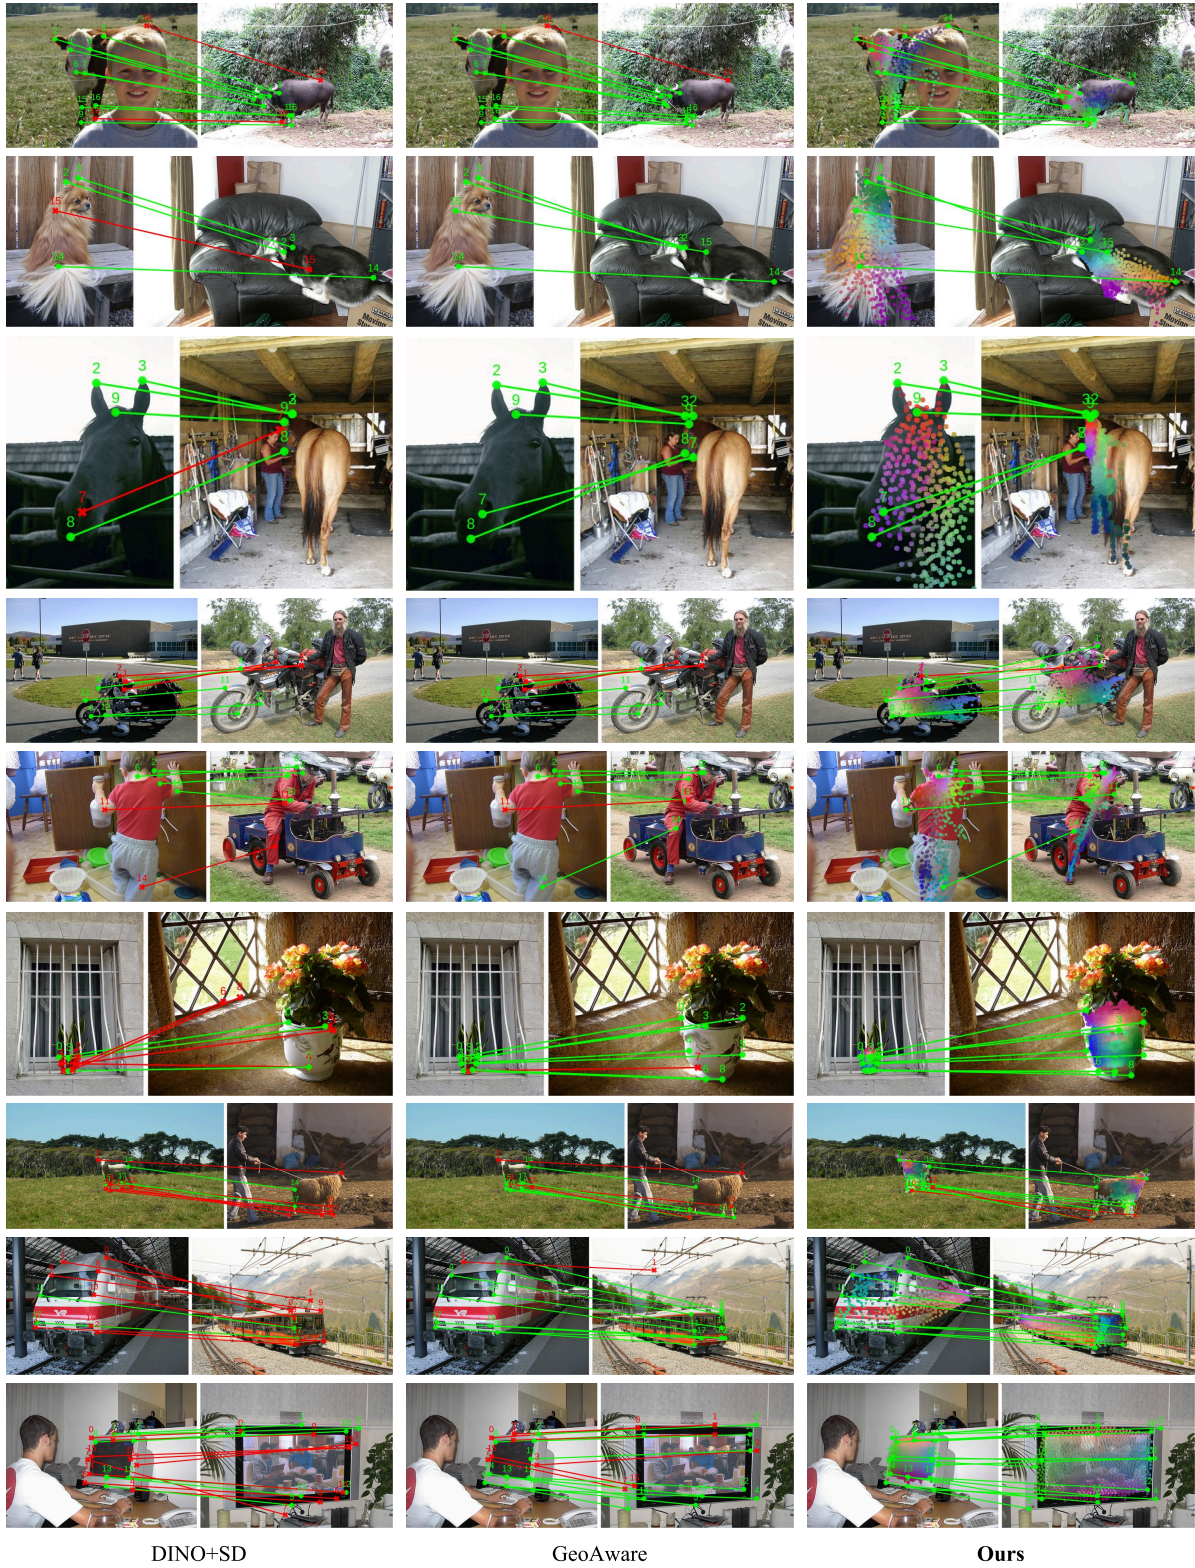

Figure 10. Qualitative comparison on SPair-71k [22] categories for sparse correspondence between DINO+SD [31], GeoAware (AP-10K P.T.) [32], and our method. Green lines (o-o) denote correct matches and red lines depict wrong matches (x-x).
